# Supplementary material
Source: publisher figshare collection journal article supplement (https://frontiersin.figshare.com/ndownloader/files/23335646)
Supplement: Supplementary file [file 23335646]

**A**

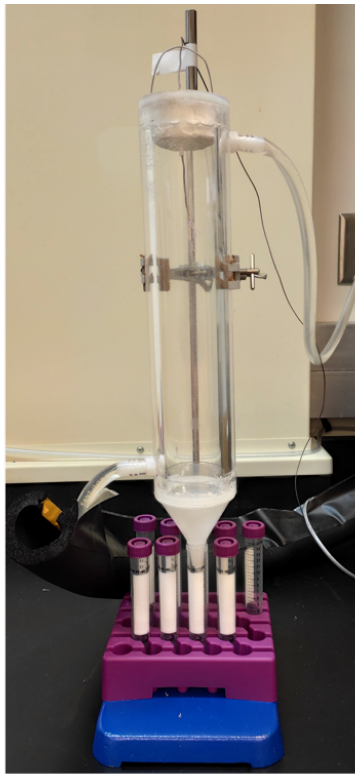

**B**

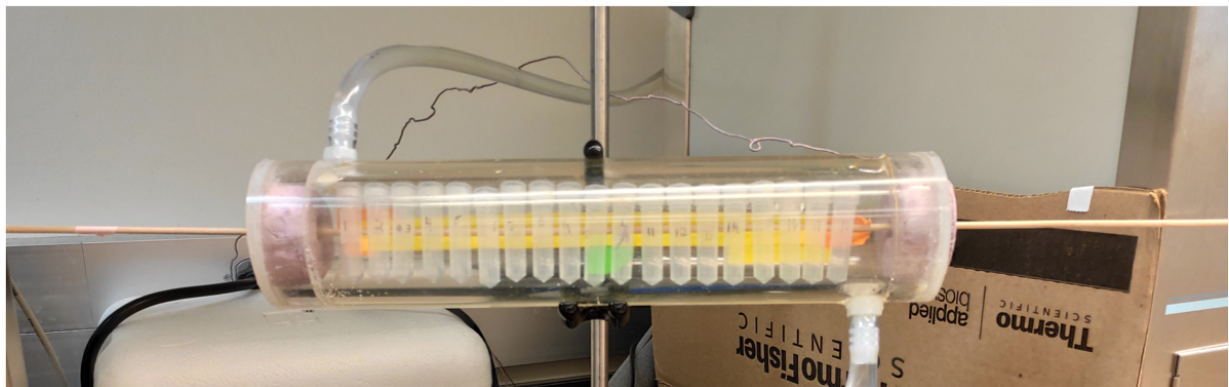

**Supplementary Figure 1. Photograph of apparatus for (A)  $CT_{min}$  and (B)  $CT_{max}$  assays.**
